# Supplementary material for: Three-Dimensional Volumetric Assessment Enhances Detection of Growth in Unruptured Intracranial Aneurysms
Source: Research Square preprint supplement (doi:10.21203/rs.3.rs-8347568/v1), 2025-12-16
Supplement: Supplementary file 1 [file 301b1668a89bccf835674fa3.docx]

# **Supplemental Material**

**Three-Dimensional Volumetric Assessment Enhances Detection of Growth in Unruptured Intracranial Aneurysms**

Navami Shenoy1, Elena Sagues1, Pujit R Mekala2, Kareem T Shoukih2, Lidia Diaz3, Domenica Cifuentes1, Ruben Calle1, Linder Wendt4, Ivonne Salinas1, Andres Gudino1, Carlos Dier1, Gowri Peethambar1, Randall Krug1, Edgar A Samaniego*1,5,6.

1Department of Neurology, University of Iowa, Iowa City, Iowa, USA.

2Carver College of Medicine, University of Iowa, Iowa City, Iowa, USA.

3Facultad de Medicina, Universidad de Málaga, Málaga, Spain.

4Institute for Clinical and Translational Science, University of Iowa, Iowa City, Iowa, USA.

5Department of Neurosurgery, University of Iowa, Iowa City, Iowa, USA.

6Department of Radiology, University of Iowa, Iowa City, Iowa, USA.

*Corresponding author: Edgar A Samaniego

Phone number: +1 319 333 4460

Mail address: 200 Hawkins Dr. Iowa City, IA 52242

University of Iowa

Email: [edgarsama@gmail.com](mailto:edgarsama@gmail.com)

**Image Acquisition Protocol**

MR studies were performed on Siemens Aera 1.5T, AvantoFit 1.5T, and Skyra 3T systems using a standardized neurovascular protocol including axial diffusion-weighted imaging (DWI), axial fluid-attenuated inversion recovery (FLAIR), susceptibility-weighted imaging (SWI), axial fat-suppressed T1-weighted imaging (T1FS), TOF-MRA, and contrast-enhanced MRA following intravenous administration of Gadavist (10 mL at 1.5 mL/s with a 30 mL saline flush).

CTA studies were performed on Siemens SOMATOM Force, including a non-contrast head CT followed by a CTA of the head from C2 through the vertex utilizing bolus tracking at the aortic arch. Post-contrast CT of the brain was obtained approximately 60 seconds after injection of 50 mL of Isovue370 contrast at 4 mL/s, followed by a 50 mL saline flush. Axial, coronal, and sagittal multiplanar reconstructions (MPR) and maximum intensity projections (MIP) were performed for review.

**Supplementary Table 1.** Imaging Protocol Parameters

|  | **CE-MRA**  **(n = 111)** | **TOF-MRA**  **(n = 6)** | **CTA**  **(n = 6)** |
| --- | --- | --- | --- |
| Scanner | Siemens Aera/AvantoFit/Skyra | Siemens Aera/AvantoFit/Skyra | Siemens SOMATOM Force |
| Field Strength | 1.5T, 3T | 1.5T, 3T | - |
| Voxel size, mm2 | 0.6 x 0.6 | 0.3 x 0.3 | 0.6 |
| Slice thickness, mm | 0.8 | 0.5 | 1 |
| TE, ms | 1.3 | 3.4 | - |
| TR, ms | 3.3 | 22 | - |
| Flip angle | 22 | 21 | - |
| Tube Voltage, kVp | - | - | 120 |
| Tube Current, mAs | - | - | 320 |

Abbreviations: CE = Contrast-enhanced

**Supplementary Table 2.** Sensitivity analysis

|  | **Total (n = 123, 98 patients)a** | **Growing (n = 24)a** | **Stable (n = 99)a** | **p-valueb** |
| --- | --- | --- | --- | --- |
| Number of aneurysms excluded (>5 mm) | 21 | 4 | 17 |  |
| MCA | 40 (32%) | 3 (12%) | 37 (37%) | 0.1133 |
| ACA/ACOM/PCOM/Posterior | 40 (32%) | 14 (58%) | 26 (26%) | 0.0231 |
| Growth (based on size) | 9 (73%) | 8 (33%) | 1 (1%) | <0.0001 |
| Time to follow-up (years) | 2 (1-4) | 4 (2-5) | 2 (1-4) | 0.024 |
| Baseline aneurysm size (mm) | 4 (2-5) | 3 (2-5) | 4 (2-5) | 0.221 |
| Follow-up aneurysm size (mm) | 4 (3-5) | 4 (3-6) | 4 (3-5) | 0.9898 |
| Change in aneurysm size (%) | 0 (0-8) | 10 (1-20) | 0 (0-4) | 0.002 |
| Baseline aneurysm volume (mm3) | 26 (12-66) | 12 (8-20) | 24 (12-50) | 0.003 |
| Follow-up aneurysm volume (mm3) | 35 (17-79) | 36 (18-82) | 35 (16-79) | 0.9027 |
| Change in aneurysm volume (%) | 13 (2-40) | 95 (71-160) | 10 (0-20) | - |

a n(%); median (Q1-Q3).

b Wilcoxon rank sum test; Chi-Squared test; Fisher's exact test.

Abbreviations: ACA = Anterior cerebral artery, ACOM = Anterior communicating artery complex, PCOM = Posterior communicating artery
